# Supplementary material for: Ag–Co ferrite-based magnetic polymeric composite film: a breakthrough in cationic dye remediation for sustainable environment
Source: PubMed Central journal article supplement (PMC11565276; doi:10.1039/d4ra06315e), 2024-11-15
Supplement: RA-014-D4RA06315E-s001.pdf [file RA-014-D4RA06315E-s001.pdf]

## Supporting Information

**Table S1: Atomic % of composite element before and after MG adsorption**

| Atom  | Before MG adsorption (%) | After MG adsorption (%) |
|-------|--------------------------|-------------------------|
| C 1s  | 63.7                     | 62.32                   |
| O 1s  | 25.5                     | 29                      |
| N 1S  | 4.24                     | 1.19                    |
| Ag 3d | 0.56                     | 0.6                     |
| Co 2p | 1.27                     | 1.55                    |
| Fe 2p | 3.66                     | 4.56                    |
| Ce    | 1.07                     | 0.78                    |

**Table S2: XPS before and after MG adsorption bond energy and intensity**

| Bond Name                        | Before MG adsorption |                 | After MG adsorption |                 |
|----------------------------------|----------------------|-----------------|---------------------|-----------------|
|                                  | Binding energy       | Intensity (CPS) | Binding energy      | Intensity (CPS) |
| C1s Scan A (C-C)                 | 284.86               | 40106.3         | 284.83              | 42252.3         |
| C1s Scan B (O-C-O)               | 286.27               | 15854.41        | 286.64              | 17677           |
| C1s Scan C (O-C=O)               | 288.35               | 7441.29         | 288.92              | 8454.88         |
| O1s Scan A (O-H)                 | 532.23               | 32148.51        | 532.63              | 41113.02        |
| O1s Scan B (O=C)                 | 529.34               | 18181.97        | 529.65              | 20103.88        |
| N1s Scan A (N-O)                 | 399.92               | 5814.28         | 399.86              | 1215.2          |
| N1s Scan B (C-N/C=N)             | 398.55               | 1107.26         | ----                | -----           |
| N1s Scan C (Bond related to C-N) | 404.58               | 750.63          | 404.95              | 599.57          |
| Ag3d5 Scan A                     | 367.82               | 13748.48        | 367.97              | 12876.24        |
| Co2p                             | 780.33               | 3555.78         | 780.76              | 4189.77         |
| Fe2p                             | 710.2                | 7602.87         | 710.29              | 9940.87         |
| Ce3d                             | 882.63               | 4342.9          | 884.27              | 2745.11         |

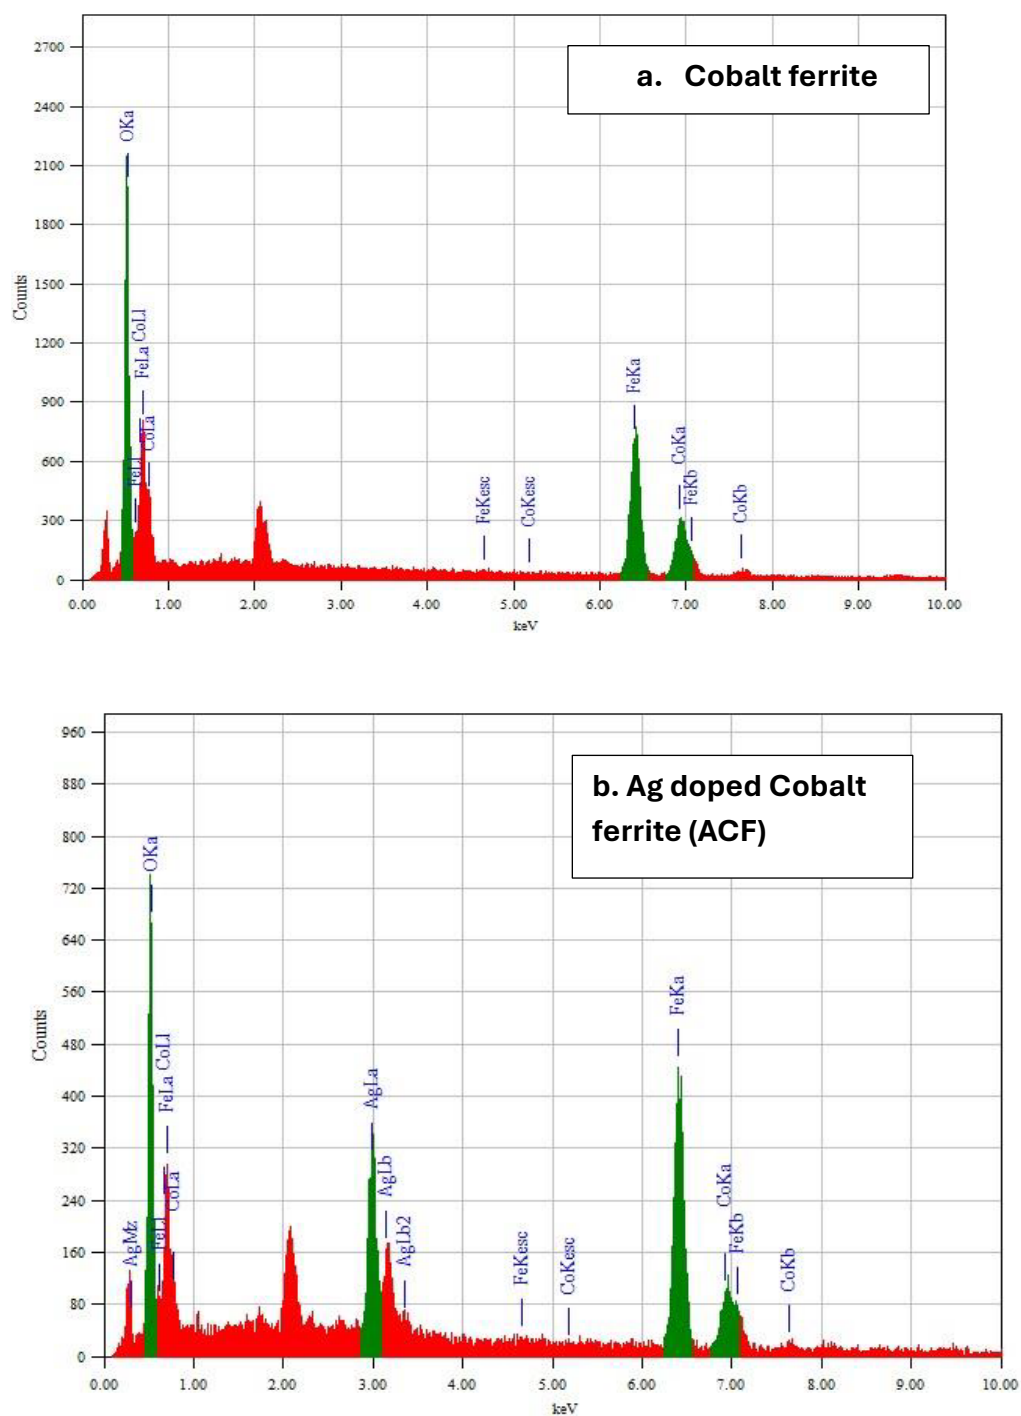

Figure S1: EDX analysis of a. CF, b. ACF

Table-S3: Elemental analysis of CF

| Element | Mass% | Atom% |
|---------|-------|-------|
| Oxygen  | 25.33 | 54.65 |
| Iron    | 49.93 | 30.86 |
| Cobalt  | 24.74 | 14.49 |

Table-S4: Elemental analysis of ACF

| Element | Mass% | Atom% |
|---------|-------|-------|
| Oxygen  | 21.90 | 52.67 |
| Iron    | 47.65 | 32.83 |
| Cobalt  | 12.25 | 8.00  |
| Silver  | 18.20 | 6.49  |

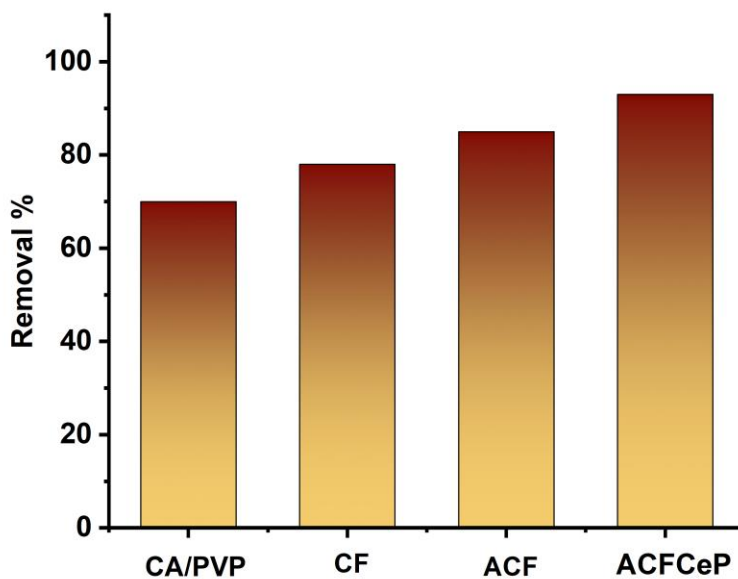

Figure-S2: Comparison of MG dye removal efficiency of CF, ACF, CA/PVP and ACFCeP

**Table S5: Non-Linear isotherm rate constant and regression coefficient values for Langmuir, Freundlich, D-R and Temkin isotherms.**

| Isotherms Model | Parameter          | Value for ACFCeP composite |
|-----------------|--------------------|----------------------------|
| Langmuir        | $q_{\max}$ (mg/gm) | 44.65                      |
|                 | K (L/mg)           | 1.20                       |
|                 | $R^2$              | 0.979                      |
| Freundlich      | $K_f$ (mg/g)       | 23.64                      |
|                 | n                  | 0.212                      |
|                 | $R^2$              | 0.922                      |
| D-R             | $K_{DR}$           | 0.388                      |
|                 | $q_m$ (mg/g)       | 38.17                      |
|                 | $R^2$              | 0.7069                     |
| Temkin          | A (Unitless)       | 6.63                       |
|                 | $K_T$ (L/mg)       | 40.27                      |
|                 | b (kg/mol)         | 373.69                     |
|                 | $R^2$              | 0.9678                     |

**Table S6 Non-Linear pseudo first order, pseudo second order and Elovich kinetic model parameters**

| Kinetic model and parameter | 20 ppm  | 60 ppm  | 100 ppm |
|-----------------------------|---------|---------|---------|
| Experimental $q_e$ (mg/g)   | 11.9081 | 32.5260 | 44.0642 |
| Pseudo first order (PFO)    |         |         |         |
| $q_e$ (mg/g)                | 11.6    | 31.6    | 41.9    |
| $K_1$ ( $\text{min}^{-1}$ ) | 0.234   | 0.212   | 0.0957  |
| $R^2$                       | 0.8989  | 0.9794  | 0.9356  |
| Pseudo second order (PSO)   |         |         |         |
| $q_e$ (mg/g)                | 11.9    | 32.9    | 46.6    |

|                                               |         |            |         |
|-----------------------------------------------|---------|------------|---------|
| $K_2$ (g mg <sup>-1</sup> min <sup>-1</sup> ) | 0.06778 | 0.0173     | 0.00312 |
| R <sup>2</sup>                                | 0.999   | 0.999      | 0.988   |
| Elovich Kinetics model                        |         |            |         |
| a (mg g <sup>-1</sup> min <sup>-1</sup> )     | 42.95   | 507791.309 | 2.75E8  |
| b (g mg <sup>-1</sup> )                       | 0.141   | 0.52072    | 2.07    |
| R <sup>2</sup>                                | 0.997   | 0.999      | 0.998   |

**Table-S7: Linear pseudo first order, second order and Elovich equations for different concentration**

| Concentration (ppm) | Pseudo first order equation | Pseudo second order equation | Elovich Kinetic equation |
|---------------------|-----------------------------|------------------------------|--------------------------|
| 20                  | $y = -0.0253x + 0.0766$     | $y = 0.0838x + 0.1031$       | $y = 0.481x + 9.7066$    |
| 60                  | $y = -0.0402x + 1.8352$     | $y = 0.0302x + 0.0662$       | $y = 1.9204x + 23.9768$  |
| 100                 | $y = -0.0657x + 3.9194$     | $y = 0.0206x + 0.2149$       | $y = 7.0224x + 12.9815$  |
